# Supplementary material for: The Use of Machine Learning Methods in Neurodegenerative Disease Research: A Scoping Review
Source: bioRxiv or medRxiv preprint supplement (doi:10.1101/2023.07.31.23293414), 2023-07-31

## **SUPPLEMENTARY MATERIAL**

### **The use of machine learning methods in neurodegenerative disease research: a scoping review**

Antonio Ciampi, Julie Rouette, Fabio Pellegrini, Gabrielle Simoneau, Bastien Caba, Arie Gafson, Carl de Moor, Shibeshih Belachew

|                  |                                                                                                                                          |
|------------------|------------------------------------------------------------------------------------------------------------------------------------------|
| <b>S1 Method</b> | MEDLINE (PubMed) search strategy                                                                                                         |
| <b>S1 Table</b>  | Study sample size of included articles using machine learning methods in neurodegenerative diseases                                      |
| <b>S2 Table</b>  | Machine learning methods extracted from the scoping review                                                                               |
| <b>S3 Table</b>  | Frequency of machine learning subthemes                                                                                                  |
| <b>S1 Figure</b> | Frequency of data type used in articles using machine learning methods for disease diagnosis, by neurodegenerative disease               |
| <b>S2 Figure</b> | Proportion of data type used in articles using machine learning methods for disease diagnosis, by neurodegenerative disease              |
| <b>S3 Figure</b> | Frequency of data type used in articles using machine learning methods for disease prognosis, by neurodegenerative disease               |
| <b>S4 Figure</b> | Proportion of data type used in articles using machine learning methods for disease prognosis, by neurodegenerative disease              |
| <b>S5 Figure</b> | Proportion of data type used in articles using machine learning methods for prediction of treatment effect, by neurodegenerative disease |
| <b>S6 Figure</b> | Proportion of data type used in articles using machine learning methods for prediction of treatment effect, by neurodegenerative disease |

## S1 Method. MEDLINE (PubMed) search strategy

((machine learning[tiab] OR machine learning[MeSH] OR Support vector machine\*[tiab] OR random forest\*[tiab] OR neural network\*[tiab] OR deep neural network\*[tiab] OR convolutional neural network\*[tiab] OR artificial neural network\*[tiab] OR bayes theorem[tiab] OR k-nearest neighbor[tiab] OR k-nearest neighbour[tiab] OR gradient boost\*[tiab] OR XGBoost[tiab] OR ADABoost[tiab] OR LightGBM[tiab] OR catboost[tiab] OR pattern recognition[tiab] OR pattern classification[tiab] OR transfer learning [tiab] OR supervised learning[tiab] OR unsupervised learning[tiab] OR semi-supervised learning[tiab] OR reinforcement learning[tiab] OR deep learning[tiab] OR cluster analys\*[tiab] OR decision tree\*[tiab] OR naive bayes\*[tiab] OR k-means cluster\*[tiab] OR latent Dirichlet allocation [tiab] OR discriminate analys\*[tiab] OR optical character recognition\*[tiab] OR chi-square automatic interaction detection\*[tiab] OR computer vision[tiab] OR marker?less motion capture\*[tiab] OR adaptive logic network\*[tiab] OR gaussian mixture\*[tiab] OR hierarchical cluster\*[tiab] OR hidden markov\*[tiab] OR multilayer perceptron\*[tiab] OR self-organizing map\*[tiab] OR mean-shift cluster\*[tiab] OR density-based spatial clustering of applications with noise\*[tiab] OR expectation-maximization cluster\*[tiab] OR autoencoder\*[tiab] OR long short-term memory[tiab] OR deep deterministic policy gradient\*[tiab] OR state-action-reward-state-action\*[tiab] OR deep belief network\*[tiab] OR generative adversarial network\*[tiab] OR restricted Boltzmann machine\*[tiab] OR Skip-gram\*[tiab] OR Q-learning\*[tiab] OR deep Q network\*[tiab] OR pose estimation\*[tiab] OR Markov decision process\*[tiab])

AND

(Alzheimer\*[tiab] OR alzheimer's dementia[tiab] OR Alzheimer disease[mesh] OR Parkinson\*[tiab] OR paralysis agitans[tiab] OR shaking palsy[tiab] OR multiple sclerosis[tiab] OR multiple sclerosis[mesh] OR amyotrophic lateral sclerosis[tiab] OR motor neuron? Disease[tiab] OR Lou Gehrig\*[tiab] OR Huntington\*[tiab] OR Huntington disease[mesh])

AND

("English"[Language])

AND

(diagnos\*[tiab] OR detection[tiab] OR "risk of disease"[tiab] OR classif\*[tiab] OR identification[tiab] OR "disease classification"[tiab] OR recognition[tiab] OR progress\*[tiab] OR propagation[tiab] OR relaps\*[tiab] OR prognos\*[tiab] OR mortality[tiab] OR survival[tiab] OR death[tiab] OR stratification[tw] OR treatment[tw] OR therapeutic[tw] OR therap\*[tw] OR patient trajector\*[tw] OR treatment trajector\*[tw] OR "Treatment Outcome"[MeSH] OR treatment effect[tw] OR "Precision Medicine"[MeSH] OR precision medicine[tw] OR prediction[tw] OR personalized medicine[tw] OR personalised medicine[tw] OR predictive[tw] OR individualized[tw])

AND

("1900/01/01"[Date - Publication] : "2020/12/31"[Date - Publication])

)

**S1 Table.** Study sample size of included articles using machine learning methods in neurodegenerative diseases

|                                     | <b>Minimum</b> | <b>Quarter 1</b> | <b>Median</b> | <b>Quarter 3</b> | <b>Maximum</b> |
|-------------------------------------|----------------|------------------|---------------|------------------|----------------|
| <b>All articles</b>                 | 2              | 63               | 151           | 459              | 88298289       |
| <b>By neurodegenerative disease</b> |                |                  |               |                  |                |
| Alzheimer's disease                 | 8              | 111              | 300           | 737              | 88298289       |
| Parkinson's disease                 | 2              | 40               | 80            | 195              | 229017         |
| Huntington's disease                | 12             | 42               | 54            | 203              | 19369          |
| Multiple sclerosis                  | 5              | 48               | 94            | 232              | 8308           |
| Amyotrophic lateral sclerosis       | 9              | 47               | 142           | 861              | 11908          |

**S2 Table.** Number of unique machine learning methods identified in the scoping review

| <b>Machine learning method</b>                                                             | <b>Frequency</b> |
|--------------------------------------------------------------------------------------------|------------------|
| 3D attention network, 3DAN                                                                 | 1                |
| 3D CNN                                                                                     | 1                |
| 3D densely connected convolutional networks (3D-DenseNets)                                 | 1                |
| 3D U Net                                                                                   | 1                |
| AdaBoost                                                                                   | 25               |
| Adaptive artificial bee colony Kernel-based weighted extreme learning machine (AABC-KWELM) | 1                |
| Adaptive boosting                                                                          | 1                |
| Adaptive ensemble manifold learning                                                        | 1                |
| Adaptive sparse learning                                                                   | 1                |
| AlexNet Transfer Learning                                                                  | 1                |
| Anatomical landmarks and directed acyclic graph (DAG) network feature learning             | 1                |
| Artificial neural network                                                                  | 53               |
| Autoencoder                                                                                | 21               |
| Automated Symbol Digits Modalities Test                                                    | 1                |
| b-constrained-optimization-based extreme learning machine (b-COELM)                        | 1                |
| b-Weighted Extreme Learning Machine (b-WELM)                                               | 1                |
| Back propagation (BP)                                                                      | 1                |
| Back Propagation Neural Network                                                            | 1                |
| Back-propagation neural network of three-layer topology                                    | 1                |
| Bagged decision tree                                                                       | 3                |
| Bagging                                                                                    | 1                |
| Bagging ensemble algorithm                                                                 | 2                |
| Bagging-based ensemble regression                                                          | 1                |
| Bayesian adaptive regression trees                                                         | 1                |
| Bayesian Belief Networks                                                                   | 1                |
| Bayesian Lasso                                                                             | 1                |
| Bayesian Machine Learning                                                                  | 1                |
| Bayesian Multitask with Structure Learning                                                 | 1                |
| Bayesian network                                                                           | 4                |
| Bayesian Neural Network                                                                    | 1                |
| Bayesian Ridge Regression                                                                  | 1                |
| BayesNet                                                                                   | 1                |
| Behavior score-embedded encoder network (BSEN)                                             | 1                |
| Bidirectional long short-term memory (BiLSTM)                                              | 3                |
| Biorthogonal wavelet transform                                                             | 1                |
| Boosted decision tree                                                                      | 2                |
| Boosted Logistic regression                                                                | 1                |
| Bootstrap Stage-Wise Model Selection (BSWiMS)                                              | 1                |
| Canonical correlation analysis                                                             | 2                |
| Cascade ensemble                                                                           | 1                |
| Cascaded multi-column RVFL+ (cmcRVFL+) framework                                           | 1                |
| Classification and Regression Tree (CART)                                                  | 5                |
| Cluster Analysis                                                                           | 2                |
| Clustered Multi-Task Learning (CMTL)                                                       | 1                |
| CNN-Stochastic Coordinate Coding (MSCC)                                                    | 1                |
| Combination of L2;pnorm of prediction loss function and L2;qnorm of feature selection      | 1                |
| Convolution Encoder Network                                                                | 1                |
| Convolutional neural network                                                               | 166              |
| Coupled boosting (CB)                                                                      | 1                |
| CoxBoost                                                                                   | 1                |
| Cubist                                                                                     | 1                |
| Decision tree                                                                              | 126              |

---

|                                                                                                  |    |
|--------------------------------------------------------------------------------------------------|----|
| Decorrelated neural network ensembles                                                            | 1  |
| Deep 3D convolutional encoder networks                                                           | 1  |
| Deep belief network                                                                              | 3  |
| Deep Boltzmann Machine                                                                           | 1  |
| Deep CNN                                                                                         | 1  |
| Deep Ensemble Learning                                                                           | 1  |
| Deep Ensemble Sparse Regression Network (DeepESRNet)                                             | 1  |
| Deep learning                                                                                    | 29 |
| Deep multi-modal fusion network                                                                  | 1  |
| Deep network-based feature selection (DN-FS)                                                     | 1  |
| Deep neural mapping large margin distribution machine (DNMLDM)                                   | 1  |
| Deep neural network                                                                              | 42 |
| Deep Polynomial Networks Algorithm                                                               | 1  |
| Deep residual neural network (ResNet)                                                            | 1  |
| Deep weighted S2MTL (DW-S2MTL)                                                                   | 1  |
| Density-based clustering (Den-sity-Based Spatial Clustering of Applications with Noise [DBSCAN]) | 1  |
| Discriminant Dictionary Learning                                                                 | 1  |
| Discriminate analysis                                                                            | 85 |
| Discriminative contractive slab and spike convolutional restricted Boltzmann Machine (DCssCRBM)  | 1  |
| Dynamic Tree Cut algorithm                                                                       | 1  |
| Echo state networks (ESNs)                                                                       | 1  |
| Elastic Net                                                                                      | 23 |
| Elastic Net Linear Regression                                                                    | 1  |
| Elastic net regression                                                                           | 1  |
| Elastic net regularized logistic regression (EN-RLR)                                             | 4  |
| Elastic net regularized regression model                                                         | 1  |
| Empirical Bayes                                                                                  | 1  |
| Empirical Bayes Transfer Learning                                                                | 1  |
| Enhanced Probabilistic Neural Network                                                            | 1  |
| Ensemble classification                                                                          | 2  |
| Ensemble learning                                                                                | 1  |
| Ensemble Linear Discriminant (ELD)                                                               | 1  |
| Ensemble method                                                                                  | 2  |
| Ensemble neural networks based on Akaike information criterion (ENN-AIC)                         | 1  |
| Ensemble transfer learning (ETL)                                                                 | 1  |
| Ensemble-bagged trees                                                                            | 1  |
| Ensemble-subspace discriminant                                                                   | 1  |
| Epinet                                                                                           | 1  |
| Evolutionary Wavelet Neural Networks                                                             | 1  |
| Evolutionary weighted random support vector machine cluster (EWRSVMC)                            | 1  |
| Expectation Maximization Diverse Density (EM-DD)                                                 | 1  |
| Expectation-maximization cluster                                                                 | 2  |
| Extra Trees Classifier                                                                           | 1  |
| Extreme gradient boosting                                                                        | 1  |
| Extreme Gradient-Boosted Decision Trees (XGB)                                                    | 1  |
| Extreme Learning Machine (ELM)                                                                   | 15 |
| F neuro-fuzzy classifiers                                                                        | 1  |
| Factor Analysis                                                                                  | 1  |
| Fast-multiple kernel learning framework                                                          | 1  |
| FC Net                                                                                           | 1  |
| FCM based Weighted Probabilistic Neural Network (FWPNN)                                          | 1  |
| Feed Forward Neural Networks                                                                     | 1  |
| Forward-Backward Support Vector Machine                                                          | 1  |
| Fully bayesian longitudinal unsupervised learning                                                | 1  |
| Fully stacked bidirectional long short-term memory (FSBi-LSTM)                                   | 1  |
| Functional logistic regression                                                                   | 1  |

---

---

|                                                                           |     |
|---------------------------------------------------------------------------|-----|
| Fused group lasso                                                         | 2   |
| Fuzzy C-mean                                                              | 1   |
| Fuzzy Granular Hyperplane Classifiers                                     | 1   |
| Fuzzy Rough Classifier                                                    | 1   |
| Gaussian discriminative component analysis                                | 1   |
| Gaussian Kernel                                                           | 1   |
| Gaussian mixture                                                          | 11  |
| Gaussian Naïve Bayes                                                      | 1   |
| Gaussian Process Classifier                                               | 1   |
| Gaussian process regression                                               | 2   |
| General additive (GAM)                                                    | 1   |
| Generalized Boosting Model                                                | 1   |
| Generalized composite multiscale entropy vector                           | 1   |
| Generalized logistic regression analysis                                  | 1   |
| Generalized matrix learning vector quantization                           | 1   |
| Generalized Multiple Kernel Learning                                      | 1   |
| Generative adversarial network                                            | 4   |
| GLMBoost                                                                  | 1   |
| Gradient boost                                                            | 59  |
| Graph based Transductive learning (GTL)                                   | 1   |
| Graph convolution network                                                 | 3   |
| Graph Filtration                                                          | 1   |
| Graph Net                                                                 | 2   |
| Graph-CNN                                                                 | 1   |
| Graph-guided multi-task learning                                          | 2   |
| Group independent component analysis                                      | 1   |
| Group Lasso                                                               | 7   |
| Hidden markov                                                             | 24  |
| Hierarchical Ascendant Classification (HAC)                               | 1   |
| Hierarchical Classification                                               | 1   |
| Hierarchical cluster                                                      | 16  |
| Hierarchical cluster analysis                                             | 1   |
| Hierarchical CNN                                                          | 1   |
| Hierarchical Graph Neural Network (hi-GCN)                                | 1   |
| High-Order Graph Matching method                                          | 1   |
| Import Vector Machine                                                     | 1   |
| Independent component analysis                                            | 2   |
| Inductive Fuzzy Classifier                                                | 1   |
| Instance-based Learning (IBL)                                             | 1   |
| Iterative Discriminative Axis Parallel Rectangle (ID-APR)                 | 1   |
| J48 classifier                                                            | 1   |
| Joint Coupled-Feature Representation and Coupled Boosting method          | 1   |
| Joint feature-sample selection (JFSS)                                     | 1   |
| Joint Linear and Logistic Regression with 2, 1-norm regularization (JLLR) | 1   |
| k-means cluster                                                           | 27  |
| k-nearest neighbor                                                        | 159 |
| Kernel Principal Component Analysis                                       | 1   |
| Kernel Ridge Regression (KRR)                                             | 1   |
| Kernel-based extreme learning machine (KELM)                              | 1   |
| Kohonen map                                                               | 1   |
| L1-norm regularized logistic regression                                   | 1   |
| L2-norm regularized logistic regression                                   | 1   |
| Large Memory STorage And Retrieval (LAMSTAR) neural network,              | 1   |
| LASSO                                                                     | 31  |
| LASSO linear regression                                                   | 1   |
| Lasso logistic regression                                                 | 40  |

---

---

|                                                                     |     |
|---------------------------------------------------------------------|-----|
| LASSO regularized Cox regression model                              | 1   |
| Latent class mixed modelling (LCMM)                                 | 1   |
| Latent Profile Analysis (LPA)                                       | 1   |
| Latent space representation                                         | 1   |
| Layer-wise relevance propagation (LRP)                              | 1   |
| Least-Square Sparse Regression Elastic Net                          | 1   |
| LightGBM                                                            | 1   |
| Linear discriminant analysis                                        | 4   |
| Linear Mixed Effects                                                | 1   |
| Linear Regression                                                   | 4   |
| Linked independent component analysis                               | 1   |
| Local naïve Bayes brain network model                               | 1   |
| Locality Preserving Projections (LPP)                               | 1   |
| Locally Linear Embedding (LLE)                                      | 1   |
| LOCALLY WEIGHTED PENALIZED REGRESSION                               | 1   |
| Logistic regression                                                 | 161 |
| Logistic regression with Elastic Net regularization                 | 1   |
| Logistic Sparse Regression Elastic Net                              | 1   |
| Logitboost                                                          | 2   |
| LOLIMOT (Local Linear Model Trees)                                  | 2   |
| Long short term memory neural networks                              | 8   |
| Long Short-Term Memory (LSTM)                                       | 2   |
| Longitudinal Siamese network (LSN)                                  | 1   |
| M5-model trees                                                      | 1   |
| MANCOVA                                                             | 1   |
| Manifold learning                                                   | 1   |
| Manifold regularized Multi-Task Feature Selection                   | 1   |
| Mean Multi-Kernel SVM                                               | 1   |
| Missingness-Aware Temporal Convolutional Hitting-time Network       | 1   |
| Mixed effect linear model                                           | 1   |
| Mixed effects model                                                 | 1   |
| Multi Kernel Learning                                               | 2   |
| Multi Modal Multi Task                                              | 1   |
| Multi Output Linear Regression with 2, 1-norm regularization (MOLR) | 1   |
| Multi Task Learning                                                 | 1   |
| Multi-feature Kernel SCDDL (MKSCDDL)                                | 1   |
| Multi-Hypergraph based Classification                               | 1   |
| Multi-kernel method with LASSO feature selection                    | 1   |
| Multi-Kernel SVM                                                    | 4   |
| Multi-modal feature selection method                                | 1   |
| Multi-Modal Multi-Task                                              | 5   |
| Multi-Task Deep Learning (MTDL)                                     | 1   |
| Multi-task Stochastic Coordinate Coding                             | 1   |
| Multi-layer clustering                                              | 1   |
| MultiBoost-AB and J48                                               | 1   |
| MultiBoost-AB and Simple Cart                                       | 1   |
| Multifactor dimensionality reduction (MDR)                          | 1   |
| Multilayer perceptron                                               | 41  |
| Multimodal random forest                                            | 1   |
| Multinomial regression                                              | 1   |
| Multiple Instance Neural Network (MI-NN)                            | 1   |
| Multiple Instance Support Vector Machine (MISVM)                    | 1   |
| Multiple kernel learning (MKL)                                      | 6   |
| Multiple linear regression                                          | 1   |
| Multiple-output elastic-net regression                              | 1   |
| Multivariate linear models                                          | 1   |

---



---

|                                                                                |     |
|--------------------------------------------------------------------------------|-----|
| Naïve Bayes                                                                    | 85  |
| Naive Support Vector Machine (Naive-SVM)                                       | 1   |
| Nearest Shrunken Centroid                                                      | 1   |
| Neighborhood Representation Local Binary Patterns method                       | 1   |
| Network Diffusion Model                                                        | 1   |
| Network wide association method                                                | 1   |
| Neural network                                                                 | 66  |
| Nu-Support Vector Classification                                               | 1   |
| Online sequential extreme learning machine (OS-ELM)                            | 1   |
| Optimal Deep Learning                                                          | 1   |
| Optimum-Path Forest (OPF)                                                      | 1   |
| Ordinary Least Squares (OLS)                                                   | 1   |
| Orthogonal least squares algorithm                                             | 1   |
| Overlapping group lasso                                                        | 1   |
| Partial least square discriminant analysis                                     | 3   |
| Partial least squares                                                          | 3   |
| Partitioning around medoids (PAM)                                              | 1   |
| Passive Aggressive Regression                                                  | 1   |
| Pearson correlation coefficient-based feature selection                        | 1   |
| Positive Transfer Learning                                                     | 1   |
| Principal component analyses (PCA)                                             | 29  |
| Principal Component Regression                                                 | 1   |
| Principal-component-based logistic regression (PC-LR)                          | 1   |
| Probabilistic neural network                                                   | 1   |
| Q-learning                                                                     | 4   |
| Radial Basis Function Network                                                  | 3   |
| Radial Basis kernels (SVM-R)                                                   | 1   |
| Random forest                                                                  | 310 |
| Random forest -MaxStat                                                         | 1   |
| Random forest -survival                                                        | 3   |
| Random Linear Oracle                                                           | 1   |
| Random Multimodal Deep Learning (RMDL)                                         | 1   |
| Random neural network cluster                                                  | 1   |
| Random Undersampling boosting                                                  | 1   |
| RandomCommittee and ExtraTree                                                  | 1   |
| Recurrent neural network                                                       | 28  |
| Recursive Partitioning and Regression Trees (RPART)                            | 1   |
| Recursive-clustering                                                           | 1   |
| Regression                                                                     | 1   |
| Regression forest                                                              | 1   |
| Regularized Bagged - Canonical Correlation Analysis (RB-CCA)                   | 1   |
| Regularized Elastic Net Logistic Regression                                    | 1   |
| Regularized logistic regression                                                | 1   |
| Reinforcement Learning                                                         | 7   |
| Relevance Vector Machine                                                       | 1   |
| Relevance vector regression (RVR)                                              | 1   |
| Repeated Incremental Pruning to Produce Error Reduction (RIPPER)               | 2   |
| Residual Neural Networks                                                       | 1   |
| ResNet                                                                         | 1   |
| Resource-efficient oblique tree with power-efficient regularization (ResOT-PE) | 1   |
| Restricted Boltzmann machine                                                   | 4   |
| Ridge Classifier                                                               | 1   |
| Ridge logistic regression                                                      | 6   |
| Ridge regression                                                               | 12  |
| Robust multi-label transfer feature learning (rMLTFL)                          | 2   |
| Safe Semi Supervised SVM                                                       | 1   |

---

|                                                                                 |              |
|---------------------------------------------------------------------------------|--------------|
| Self-paced learning (SPL)                                                       | 1            |
| Semi-supervised Multi-view learning Clustering architecture technology (SMC)    | 1            |
| Semi-supervised 3C strategy (Categorize, Cluster, Classify—CCC)                 | 1            |
| Soft max                                                                        | 1            |
| Sparse and functional principal component analysis (SFPCA)                      | 1            |
| Sparse high-order interaction model with rejection option (SHIMR)               | 1            |
| Sparse Joint Classification and Regression                                      | 2            |
| Sparse multi-task learning                                                      | 1            |
| Sparse regression                                                               | 1            |
| Sparse-response deep belief network (SR-DBN) model                              | 1            |
| Sparsity Preserving Projections (SPP)                                           | 1            |
| Spatial-Temporal Convolutional-Recurrent Neural Network                         | 1            |
| Stacked Classifier                                                              | 1            |
| Stacked long short-term memory (SLSTM)                                          | 1            |
| SubMito-XGBoost                                                                 | 1            |
| Supervised Cluster Analysis                                                     | 1            |
| Supervised ensemble learning                                                    | 1            |
| Supervised Euclidean distance-based clustering method                           | 1            |
| Supervised Joint Classification and Regression (JCR)                            | 1            |
| Supervised within-Class-Similar Discriminative Dictionary Learning              | 1            |
| Support vector data description                                                 | 1            |
| Support vector machine                                                          | 651          |
| Support vector machine (well SVM)                                               | 1            |
| Support vector machine +RBF kernel                                              | 1            |
| Support vector machine with gaussian kernels                                    | 1            |
| Support vector machine-based recursive feature elimination (SVM-RFE)            | 1            |
| Support Vector Regression                                                       | 1            |
| Swarm                                                                           | 1            |
| Symbolic Regression                                                             | 1            |
| Temporal Cluster Analysis                                                       | 1            |
| Transfer learning                                                               | 3            |
| Tree guided sparse learning                                                     | 1            |
| Tree regression                                                                 | 1            |
| Two-step clustering                                                             | 1            |
| Universum support vector machine based recursive feature elimination (USVM-RFE) | 1            |
| Unsupervised Binary Trees                                                       | 1            |
| Unsupervised Deep Autoencoder                                                   | 1            |
| Unsupervised Diffusion Component Analysis                                       | 1            |
| Unsupervised learning                                                           | 1            |
| Unsupervised machine learning model                                             | 1            |
| VGG16                                                                           | 1            |
| View-aligned hypergraph classification                                          | 1            |
| Wavelet Scattering Transform with Support Vector Machine (WST-SVM)              | 1            |
| Weighted gene co-expression network analysis                                    | 1            |
| Weighted visibility graph                                                       | 1            |
| XGBoost                                                                         | 5            |
| XGBoost-Linear                                                                  | 1            |
| XGBoost-Tree                                                                    | 1            |
| <b>Total</b>                                                                    | <b>2,734</b> |

**S3 Table.** Frequency of machine learning subthemes

| <b>Theme</b>         | <b>Machine learning subtheme</b> | <b>Frequency <sup>a</sup></b> |
|----------------------|----------------------------------|-------------------------------|
| Supervised methods   | Supervised                       | 125                           |
| Supervised methods   | Classification                   | 72                            |
| Supervised methods   | Discrimination                   | 11                            |
| Supervised methods   | Support vector machine           | 19                            |
| Supervised methods   | Naïve Bayes                      | 3                             |
| Supervised methods   | Regression                       | 64                            |
| Supervised methods   | Multiple response                | 7                             |
| Supervised methods   | Longitudinal response            | 7                             |
| Supervised methods   | Linear mixed model               | 4                             |
| Supervised methods   | Generalized regression           | 19                            |
| Supervised methods   | Gaussian process                 | 2                             |
| Supervised methods   | survival response                | 3                             |
| Supervised methods   | penalized                        | 28                            |
| Supervised methods   | LASSO and generalizations        | 8                             |
| Supervised methods   | Elastic net and generalization   | 10                            |
| Supervised methods   | Decision tree/CART               | 26                            |
| Supervised methods   | Random forest                    | 6                             |
| Supervised methods   | Functional data                  | 2                             |
| Unsupervised methods | Semi-supervised                  | 8                             |
| Unsupervised methods | Unsupervised                     | 46                            |
| Unsupervised methods | Clustering                       | 23                            |
| Unsupervised methods | Hierarchical                     | 6                             |
| Unsupervised methods | k-nearest neighbors              | 2                             |
| Unsupervised methods | Spectral clustering              | 0                             |
| Unsupervised methods | Association models               | 6                             |
| Unsupervised methods | Model-based                      | 64                            |
| Unsupervised methods | Case-based                       | 17                            |
| Unsupervised methods | Instance-based                   | 2                             |
| Unsupervised methods | Dimensionality reduction         | 20                            |
| Unsupervised methods | Latent space                     | 4                             |
| Unsupervised methods | Feature selection                | 13                            |
| Unsupervised methods | Sample selection                 | 1                             |
| Unsupervised methods | Kernel methods                   | 15                            |
| Unsupervised methods | Manifold methods                 | 4                             |
| Bayesian             | Bayesian approach                | 15                            |
| Bayesian             | Bayesian/Belief network          | 5                             |
| Ensemble methods     | Ensemble methods                 | 49                            |

---

|                        |                              |    |
|------------------------|------------------------------|----|
| Ensemble methods       | Boosting                     | 17 |
| Ensemble methods       | Baggins                      | 6  |
| Ensemble methods       | ADABOOST                     | 1  |
| Ensemble methods       | X gradient boosting          | 5  |
| Reinforcement learning | Reinforcement learning       | 3  |
| Neural net             | Deep learning                | 90 |
| Neural net             | Artificial neural network    | 40 |
| Neural net             | Extreme learning machine     | 8  |
| Neural net             | Convolutional neural network | 17 |
| Neural net             | Recurrent neural network     | 7  |
| Neural net             | Based on fuzzy logic         | 8  |
| Neural net             | Transfer learning            | 6  |
| Deep learning          | Multi-task                   | 12 |
| Deep learning          | Multi-mode                   | 9  |
| Deep learning          | Multiple instances           | 3  |
| Deep learning          | Optimization                 | 7  |
| Deep learning          | Algorithm                    | 17 |
| Deep learning          | Method involving graph       | 14 |
| Bionet                 | BioNet                       | 6  |

---

<sup>a</sup> A machine learning method could be assigned to more than one subtheme

**S1 Fig.** Frequency of data type used in articles using machine learning methods for disease diagnosis, by neurodegenerative disease <sup>a</sup>

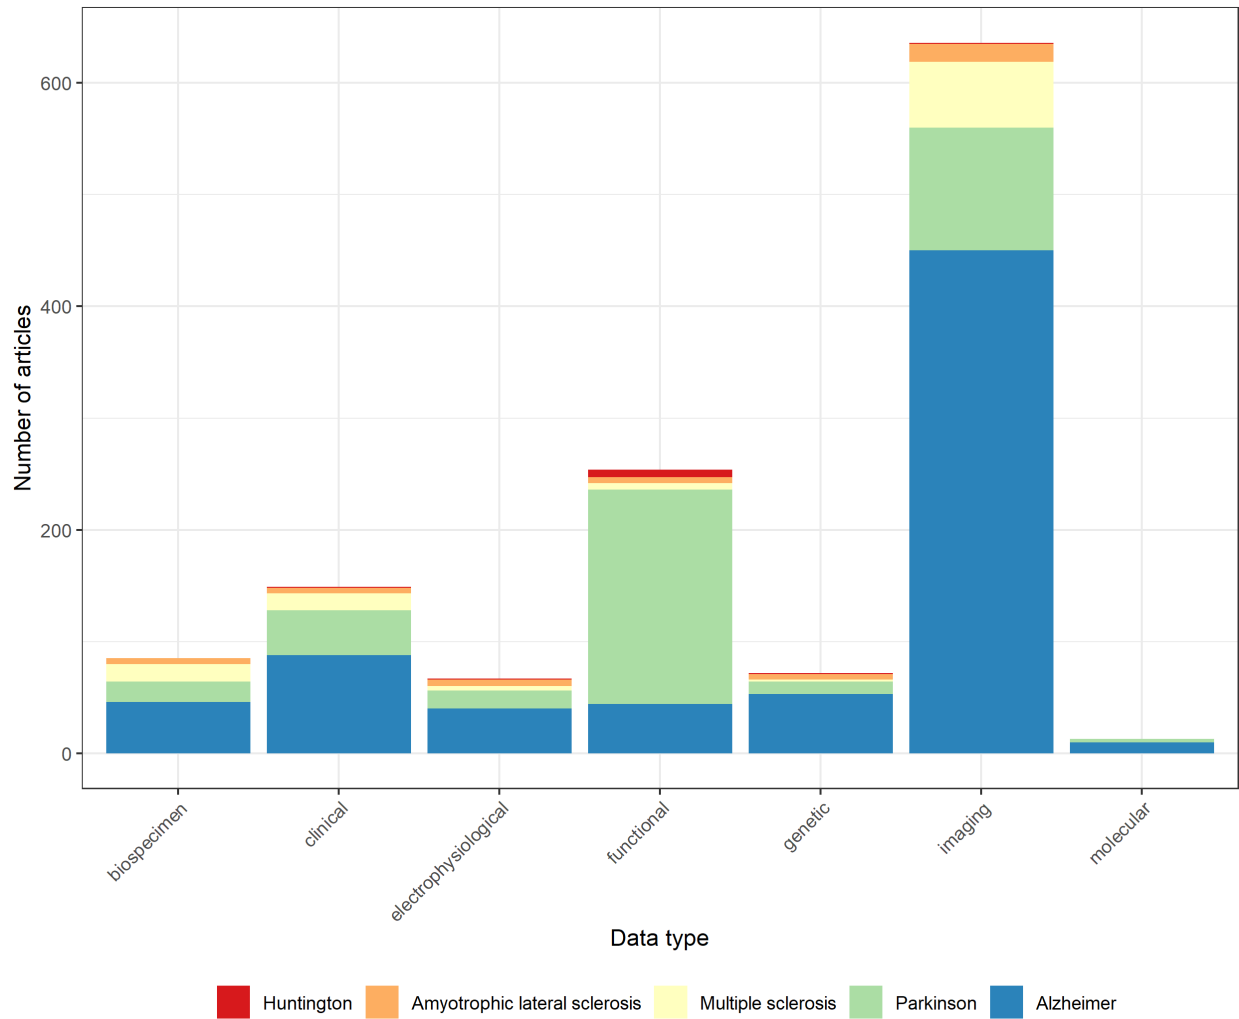

<sup>a</sup> An article can include more than one data type

**S2 Fig.** Proportion of data type used in articles using machine learning methods for disease diagnosis, by neurodegenerative disease

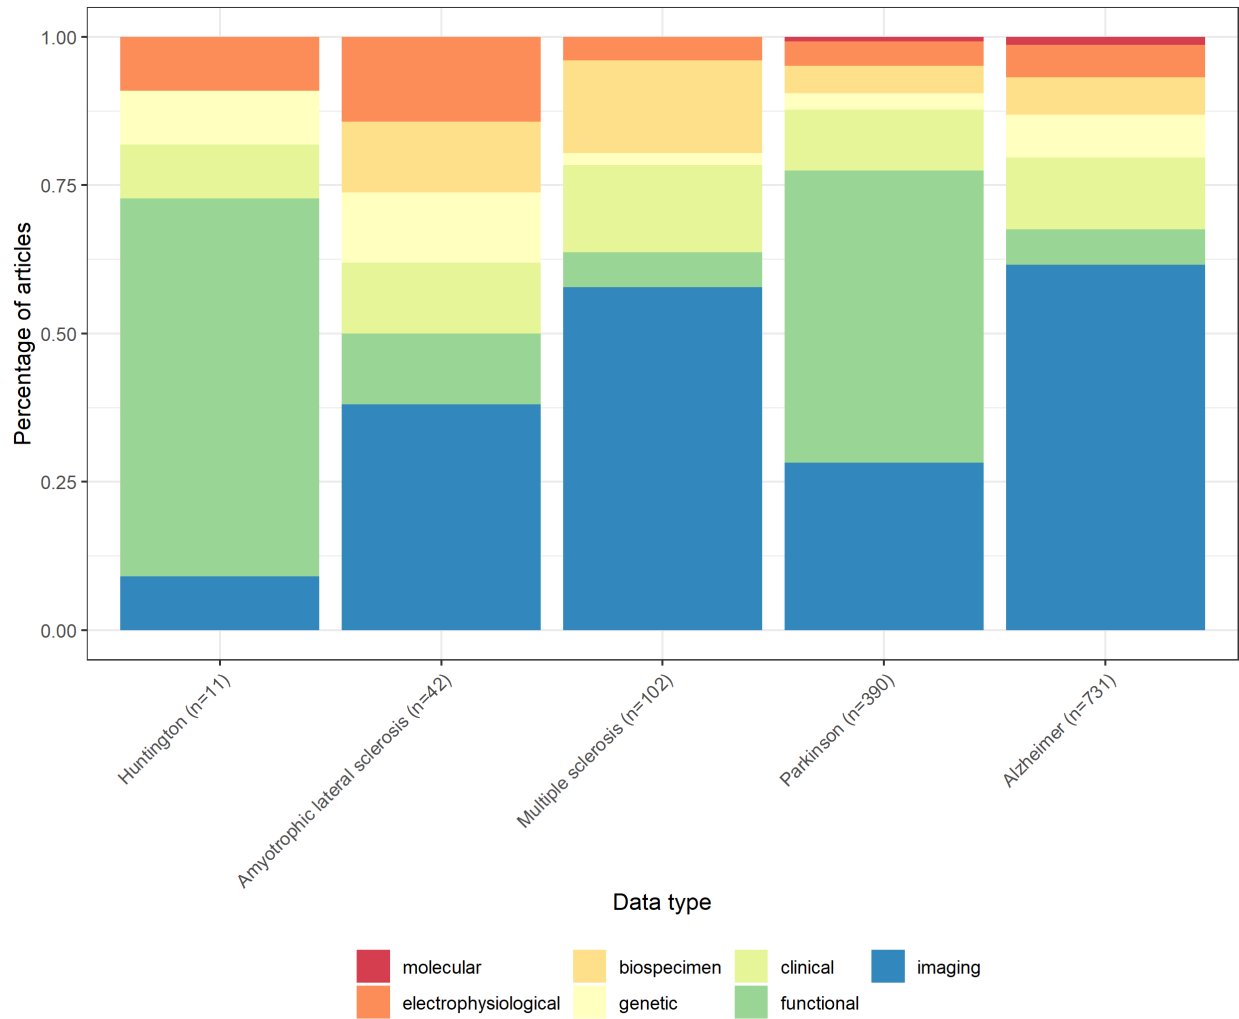

**S3 Fig.** Frequency of data type used in articles using machine learning methods for disease prognosis, by neurodegenerative disease <sup>a</sup>

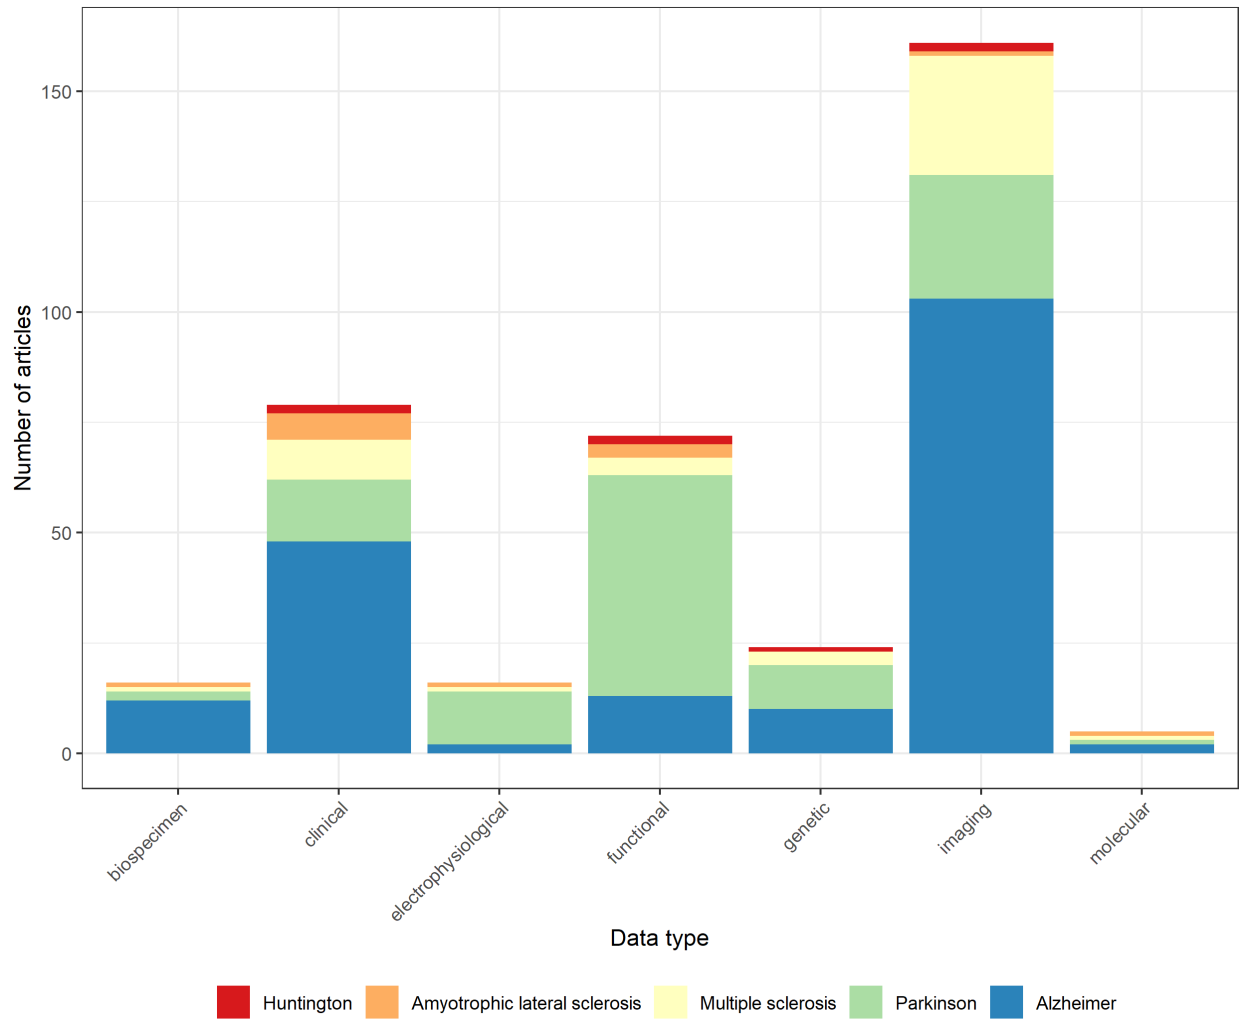

<sup>a</sup> An article can include more than one data type

**S4 Fig.** Proportion of data type used in articles using machine learning methods for disease prognosis, by neurodegenerative disease

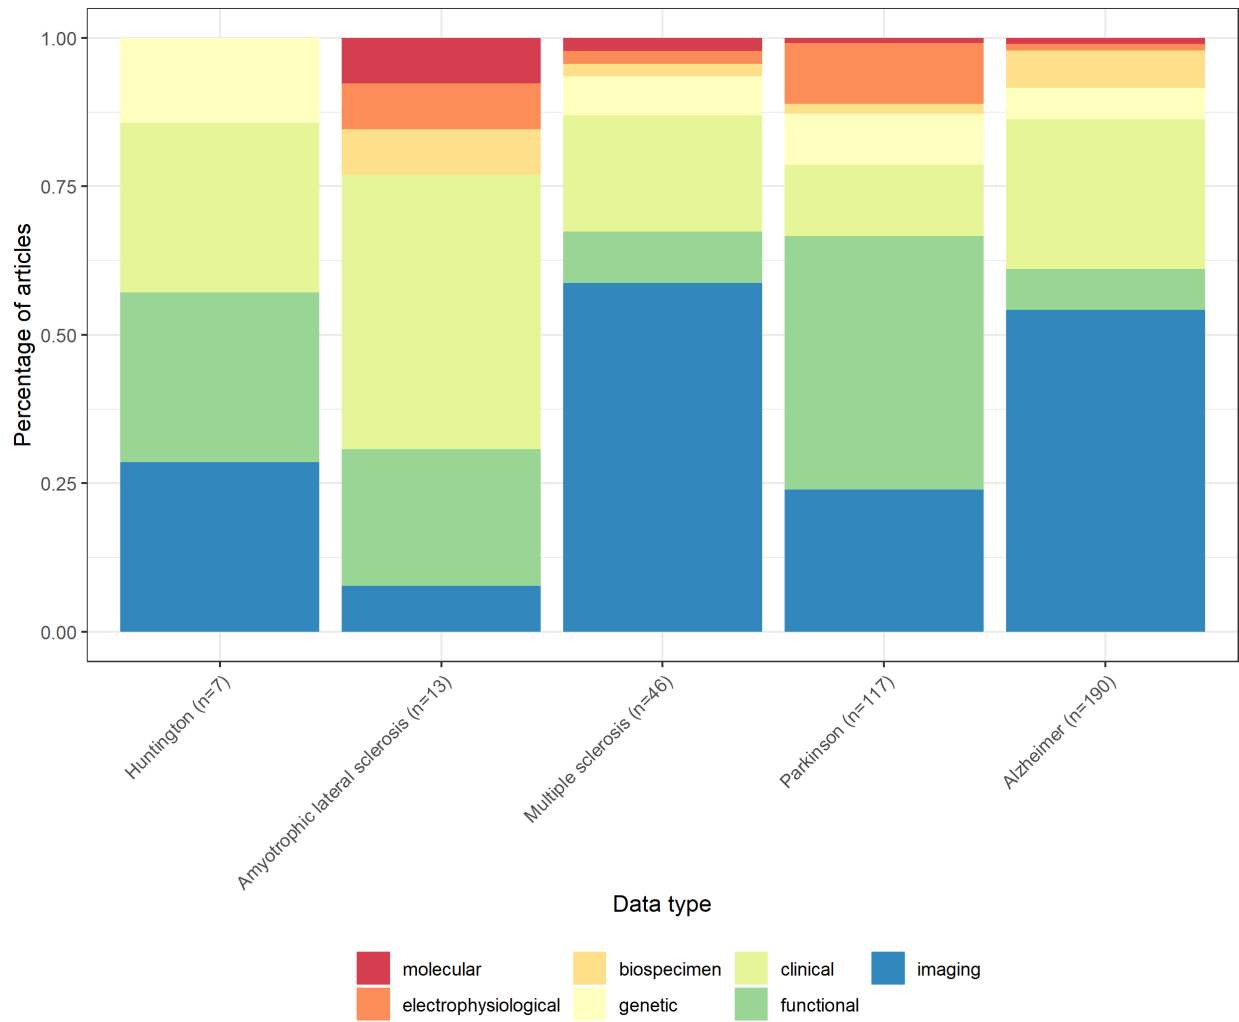



**S5 Fig.** Frequency of data type used in articles using machine learning methods for prediction of treatment effect, by neurodegenerative disease <sup>a</sup>

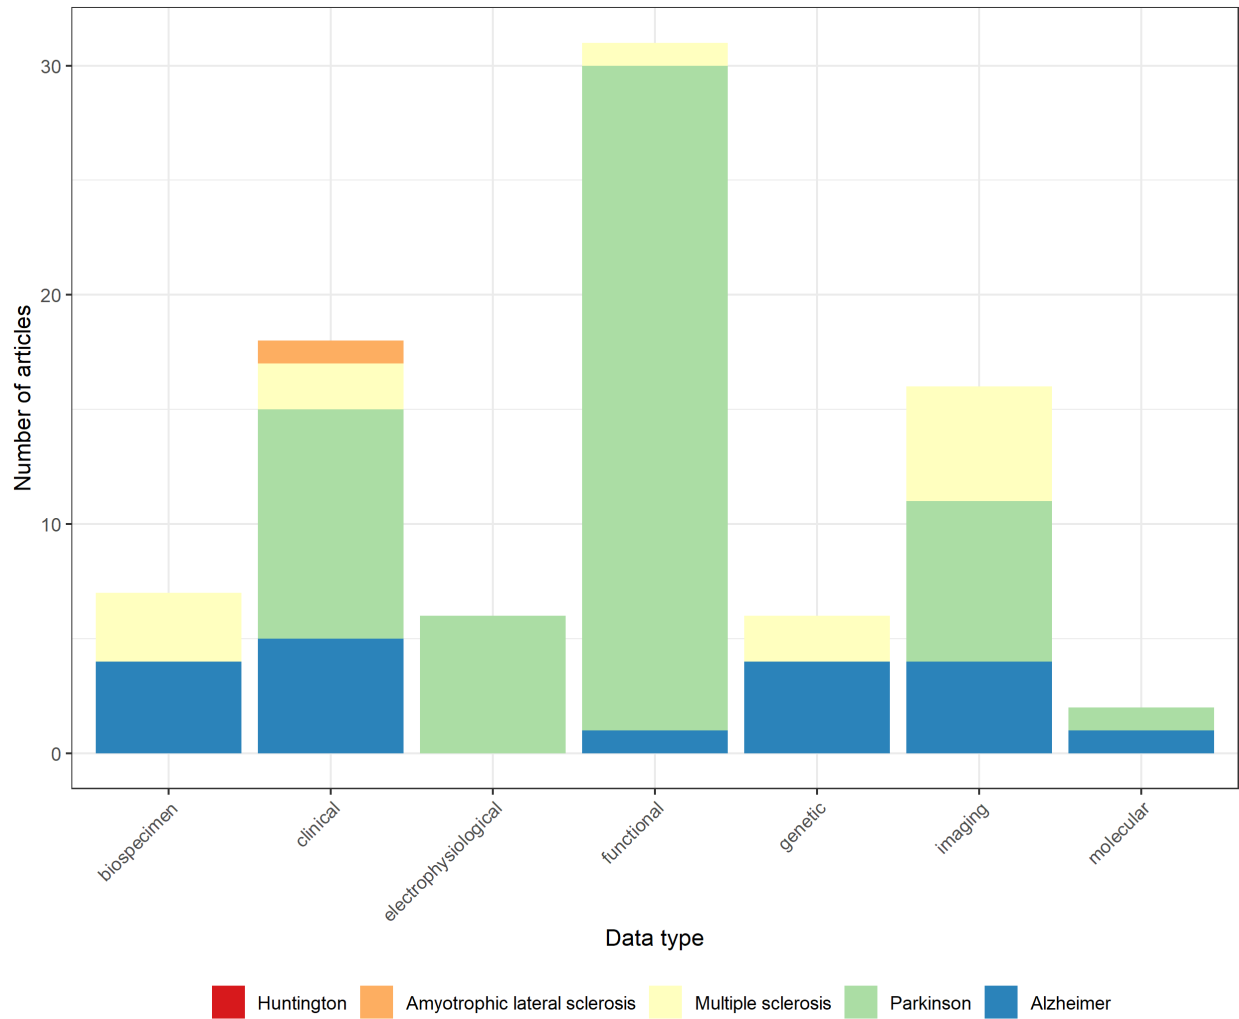

<sup>a</sup> An article can include more than one data type

**S6 Fig.** Proportion of data type used in articles using machine learning methods for prediction of treatment effect, by neurodegenerative disease

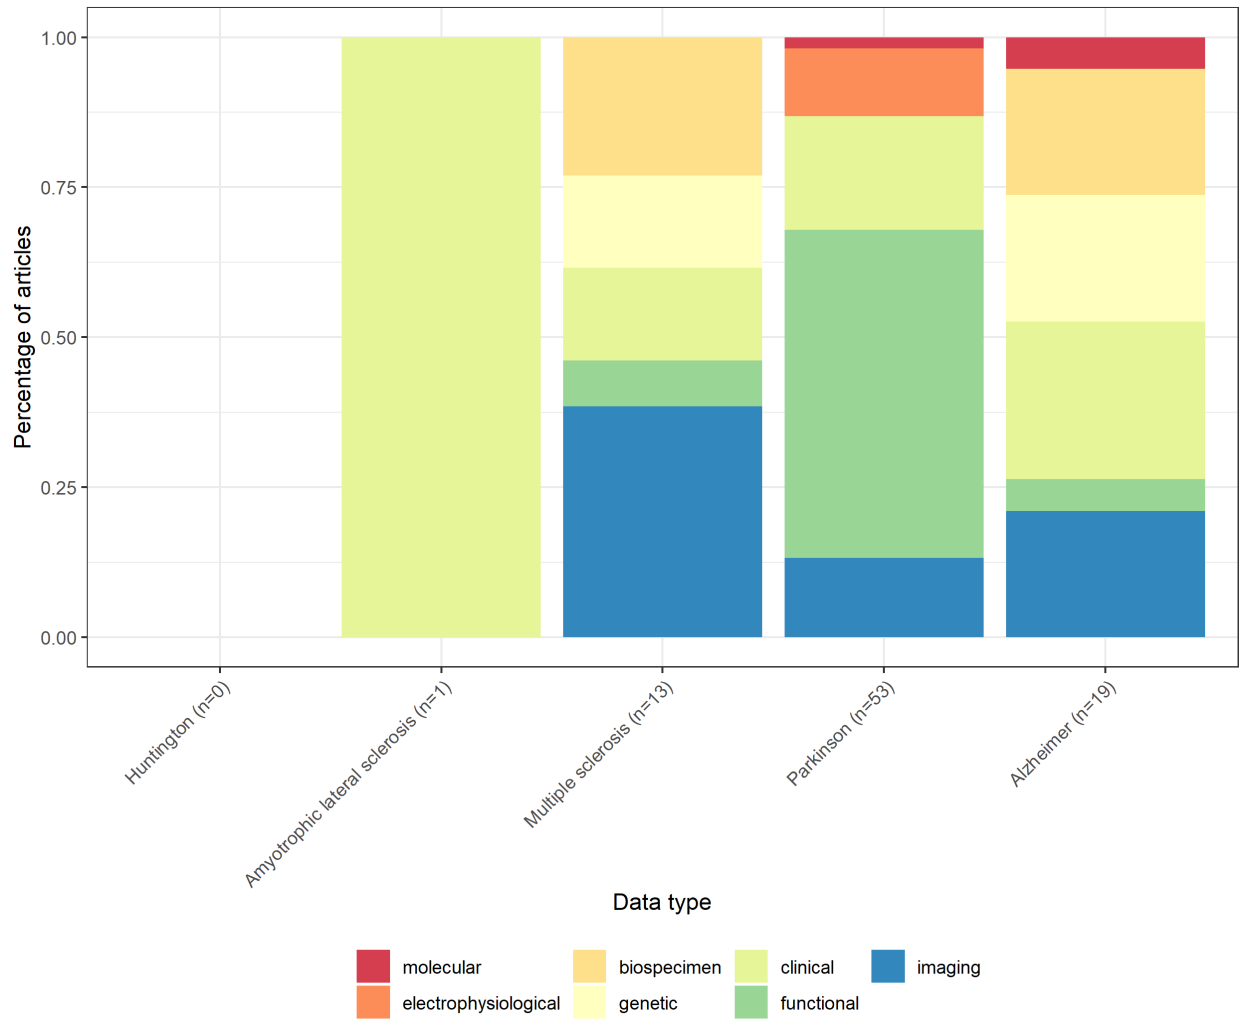

Supplement: Supplementary file [file media-1.pdf]
